# Supplementary material for: Recognizing Disguised Faces: Human and Machine Evaluation
Source: PubMed Central journal article supplement (PMC4100743; doi:10.1371/journal.pone.0099212), 2014-07-16
Supplement: pone.0099212.s001.pdf [file pone.0099212.s001.pdf]

|                                    |                                                                                                                                                                         |                                                                                                                                                                         |                                                                                                                                                                 |
|------------------------------------|-------------------------------------------------------------------------------------------------------------------------------------------------------------------------|-------------------------------------------------------------------------------------------------------------------------------------------------------------------------|-----------------------------------------------------------------------------------------------------------------------------------------------------------------|
| <b>Image</b>                       |                                                                                       |                                                                                       |                                                                              |
| <b>URL</b>                         | <a href="http://www.flickr.com/photos/11325321@N08/7846433220/sizes/o/in/photostream/">http://www.flickr.com/photos/11325321@N08/7846433220/sizes/o/in/photostream/</a> | <a href="http://www.flickr.com/photos/67861164@N05/7246988794/sizes/o/in/photostream/">http://www.flickr.com/photos/67861164@N05/7246988794/sizes/o/in/photostream/</a> | <a href="http://www.flickr.com/photos/greylloch/8585849790/sizes/o/in/photostream">http://www.flickr.com/photos/greylloch/8585849790/sizes/o/in/photostream</a> |
| <b>License</b>                     | CC BY 2.0                                                                                                                                                               | CC BY 2.0                                                                                                                                                               | CC BY-SA 2.0                                                                                                                                                    |
| <b>Username and URL of creator</b> | starrynight_012<br><a href="http://www.flickr.com/photos/11325321@N08/">http://www.flickr.com/photos/11325321@N08/</a>                                                  | RockyandNelson<br><a href="http://www.flickr.com/photos/67861164@N05/">http://www.flickr.com/photos/67861164@N05/</a>                                                   | greylloch<br><a href="http://www.flickr.com/photos/greylloch/">http://www.flickr.com/photos/greylloch/</a>                                                      |
